# Supplementary material for: Spine-to-Dendrite Calcium Modeling Discloses Relevance for Precise Positioning of Ryanodine Receptor-Containing Spine Endoplasmic Reticulum
Source: Springer Nature journal article supplement (doi:10.1038/s41598-018-33343-9), 2018-10-17
Supplement: MOESM1 [file 41598_2018_33343_MOESM1_ESM.pdf]

**Supplemental material to the manuscript**

**Spine-to-Dendrite Calcium Modeling Discloses Relevance for  
Precise Positioning of Ryanodine-Receptor-Containing Spine  
Endoplasmic Reticulum**

**Markus Breit, Marcus Kessler, Martin Stepniewski, Andreas Vlachos,  
Gillian Queisser**

## Supplemental Figure S1

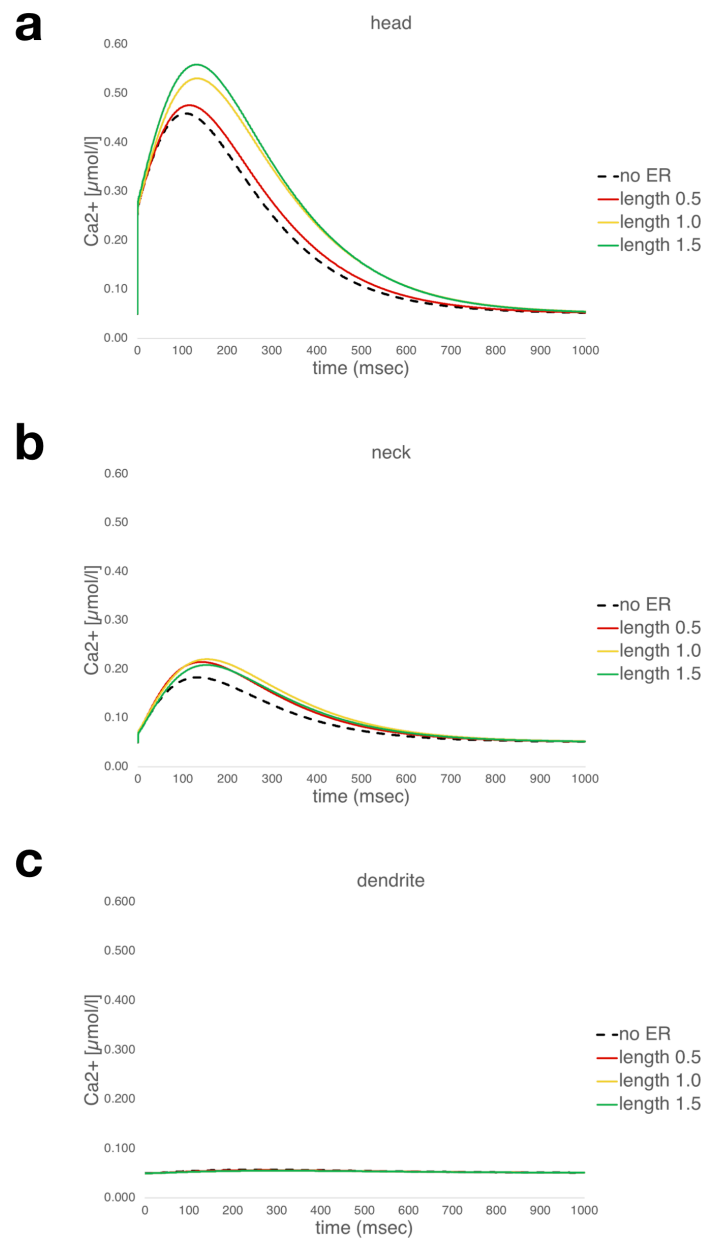

**Supplemental Figure S1:** Effects of passive spine ER on spine-to-dendrite  $\text{Ca}^{2+}$  signaling in response to 150 ms  $\text{Ca}^{2+}$  release into the spine head.} Comparable to the results presented in Fig. 2 and consistent with experimental data, only a small fraction of  $\text{Ca}^{2+}$  released in the head (a), propagating through the neck (b) reaches the dendritic compartment (c). When the ER is present only as a geometric obstacle, nearly identical and near-zero dendritic  $\text{Ca}^{2+}$  profiles for all ER lengths are observed.

## Supplemental Figure S2

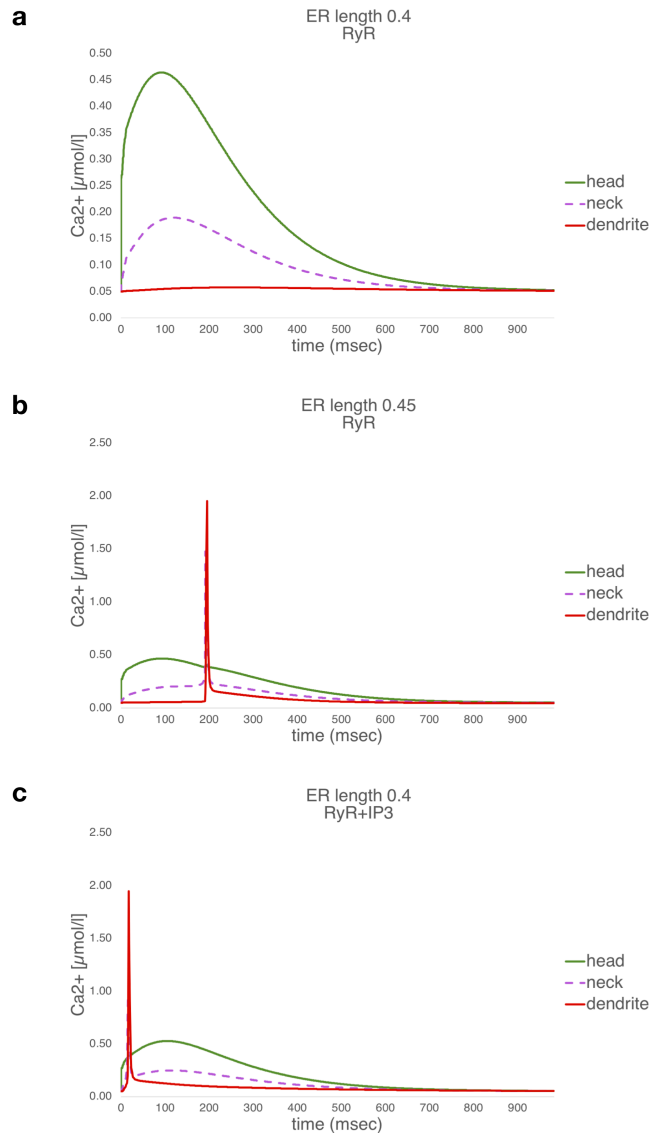

**Supplemental Figure S2:** Critical spine ER transition lengths regulate all-or-nothing spine-to-dendrite communication in response to 150 ms  $\text{Ca}^{2+}$  influx into the spine head. **(a)** For a RyR-containing ER of length 0.4  $\mu\text{m}$ , no  $\text{Ca}^{2+}$  communication to the dendrite can be measured. **(b)** Increasing the RyR-containing ER to a length of 0.45  $\mu\text{m}$  surpasses a critical spine ER length to trigger spine-to-dendrite communication. **(c)** Adding IP<sub>3</sub>R to the ER allows for spine-to-dendrite signals at an ER length for which RyR-only ER was not capable of transmitting a signal to the dendrite (see panel (a) of this figure). While the exact position of this transition zone depends on the initial  $\text{Ca}^{2+}$  release in the spine head, the effects of the spine ER within this critical zone are robust. Note the rapid  $\text{Ca}^{2+}$  release from the ER, which "sharpens" the signal (c.f., Figure 6f).
